# Supplementary material for: Targeting Loxosceles spider Sphingomyelinase D with small-molecule inhibitors as a potential therapeutic approach for loxoscelism
Source: PubMed Central journal article supplement (PMC6327989; doi:10.1080/14756366.2018.1546698), 2019-01-07
Supplement: IENZ_A_1546698_SM5267.pdf [file IENZ_A_1546698_SM5267.pdf]

**Compound 2**

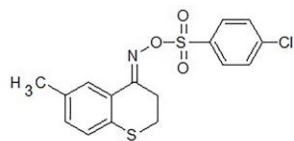

**Compound 3**

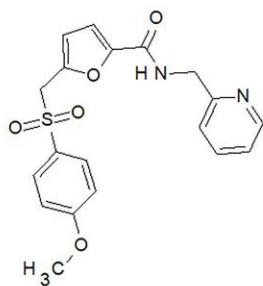

**Compound 4**

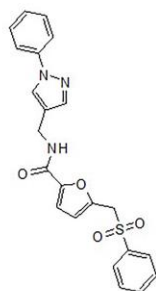

**Compound 7**

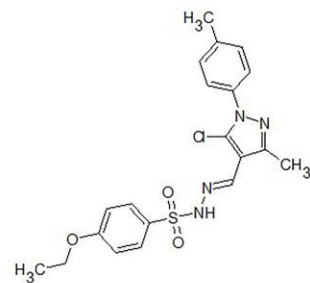

**Compound 8**

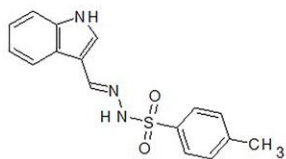

**Compound 9**

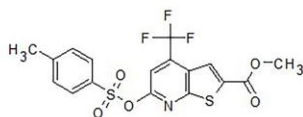

**Compound 10**

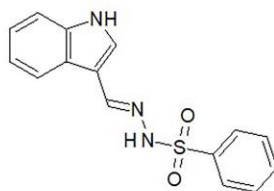

**Compound 11**

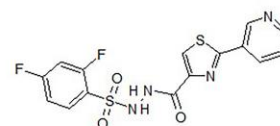

**Compound 12**

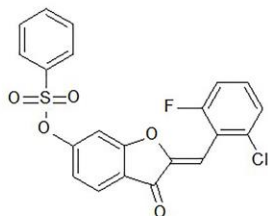

**Compound 13**

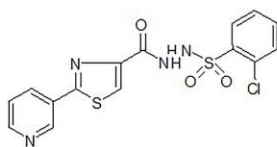

**Compound 14**

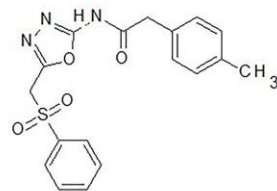

Supplementary Figure 1
